# Supplementary material for: The enhanced responsivity and response speed of SnO2 visible-blind transparent photodetectors via the SiO2 passivation layer
Source: Royal Society of Chemistry journal article supplement (doi:10.1039/d3dt03920j), 2024-01-01
Supplement: d3dt03920j1.pdf [file d3dt03920j1.pdf]

## Supporting Information

### Enhanced responsivity and respond speed of SnO<sub>2</sub> visible-blind transparent photodetector via SiO<sub>2</sub> passivation layer

Mingkun Huang <sup>a</sup>, Yue Wang <sup>a</sup>, Lei Yang <sup>a</sup>, Sen Ren <sup>b</sup>, Le Wang <sup>a</sup>, Yuanhao Kang <sup>a</sup>,  
Niumiao Zhang <sup>a\*</sup>

<sup>a</sup> Institute of Photonics & Photon-Technology and School of Physics, Northwest University, Xi'an 710069, China

<sup>b</sup> Laboratory of Thin Film Techniques and Optical Test, Xi'an Technological University, Xi'an 710032, China

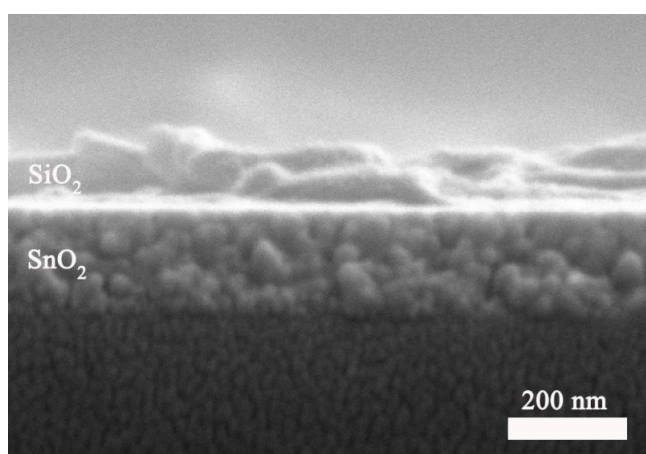

Fig. S1 Cross-sectional SEM images of SnO<sub>2</sub>/SiO<sub>2</sub> composite structures.

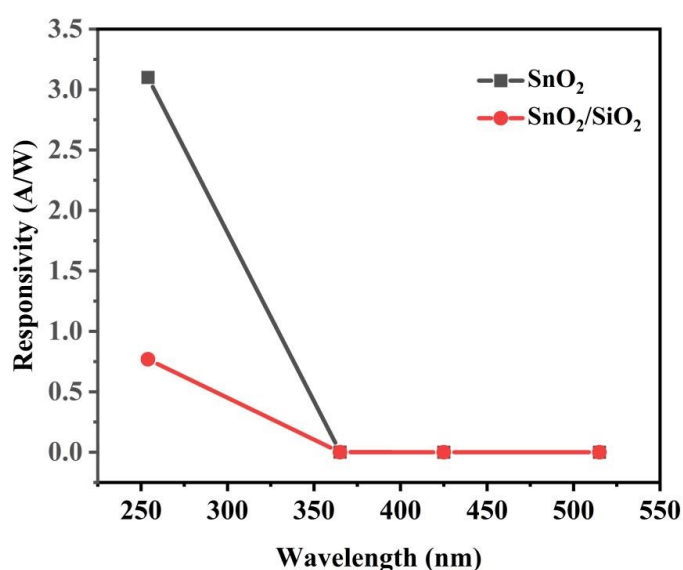

Fig. S2 Responsivity curves of the two different devices measured at a bias of -5 V.
